# Supplementary material for: A Titin Missense Variant Causes Atrial Fibrillation
Source: PubMed Central journal article supplement (PMC11643245; doi:10.1101/2024.12.06.24318402), 2024-12-08
Supplement: NIHPP2024.12.06.24318402V1-supplement-1.pdf [file NIHPP2024.12.06.24318402V1-supplement-1.pdf]

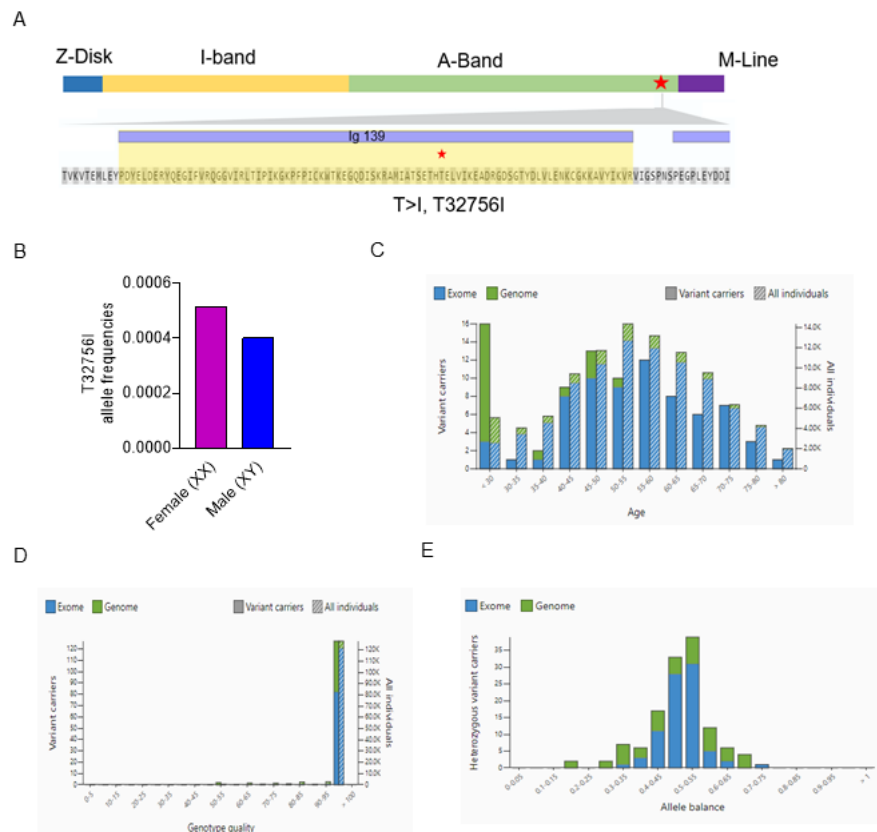

**Supplementary Figure 1: *TTN*-T32756I position and distribution.** (A) Location of the T32756I at Ig139 domain in the A-band of titin. (B) Allele frequencies of T3265I between sexes. (C) Age distribution of the variant carriers. (D) Genotype quality. (E) Allele balance for heterozygotes. Source: [https://gnomad.broadinstitute.org/variant/2-179404525-G-A?dataset=gnomad\\_r2\\_1](https://gnomad.broadinstitute.org/variant/2-179404525-G-A?dataset=gnomad_r2_1).

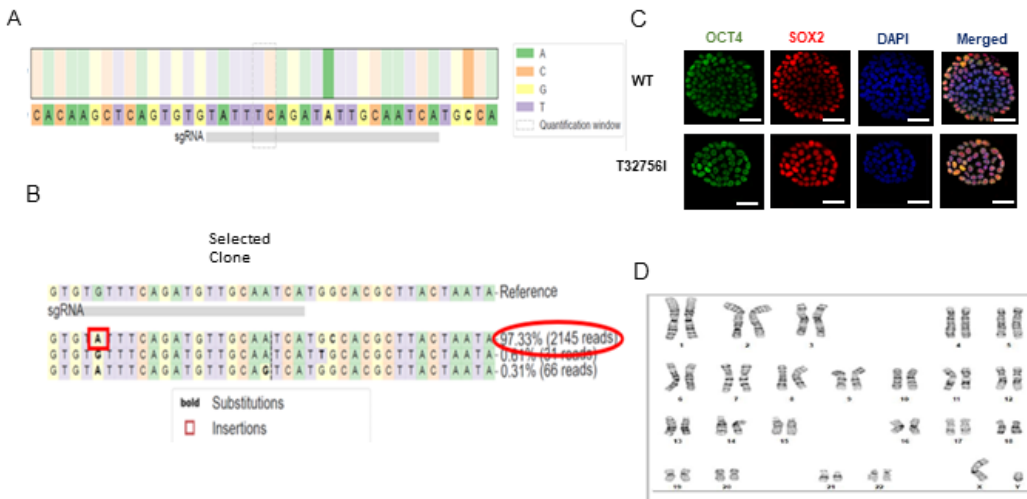

**Supplementary Figure 2: Generation of iPSC-aCMs with *TTN*-T32756I.** (A) *TTN* gene locus for generation of isogenic iPSCs with the T32756I variation. Guide sequence (gRNA) shown in the bottom gray box was cloned into vector to express gRNA guiding Cas9 exonuclease to the targeted protospacer adjacent motif sequence. (B) Next generation sequencing of the confirming T32756I mutation. (C) Representative immunostaining of pluripotency markers OCT4 and SOX2 in iPSCs. The 4',6-diamidino-2-phenylindole (DAPI) indicates the nucleus. (D) Karyotype analysis of the T32756I iPSCs.

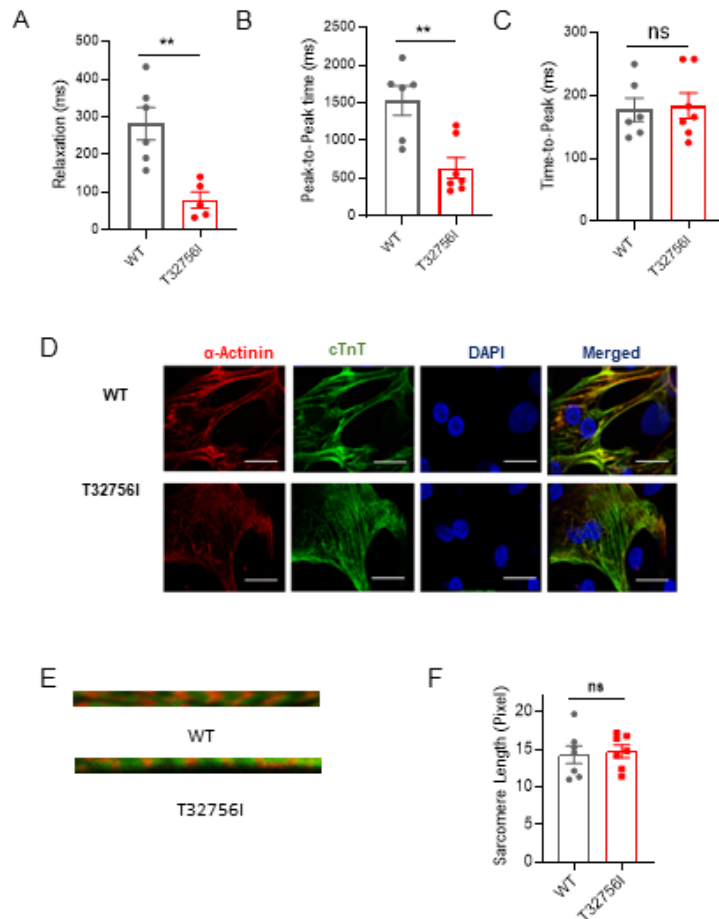

**Supplementary Figure 3: Contractility and sarcomere organization of *TTN*-T32756I iPSC-aCMs.** (A-C) Compared to WT, *TTN*-T32756I (Red) iPSC-aCMs show increased decreased Relaxation time (A), Contraction Amplitude (B), but no significant change to Time-to-Peak (C). (D-E) Immunostaining showing the sarcomeric organization of WT and *TTN*-T32756I iPSC-aCM by the pan-cardiomyocyte (CM) marker cardiac troponin T (cTnT; green) and  $\alpha$ -actinin (orange). The DAPI staining indicates the nucleus. (F) Bar graph showing no change in the sarcomere length. n.s.  $P > 0.05$ ; \*\* $P < 0.01$ .

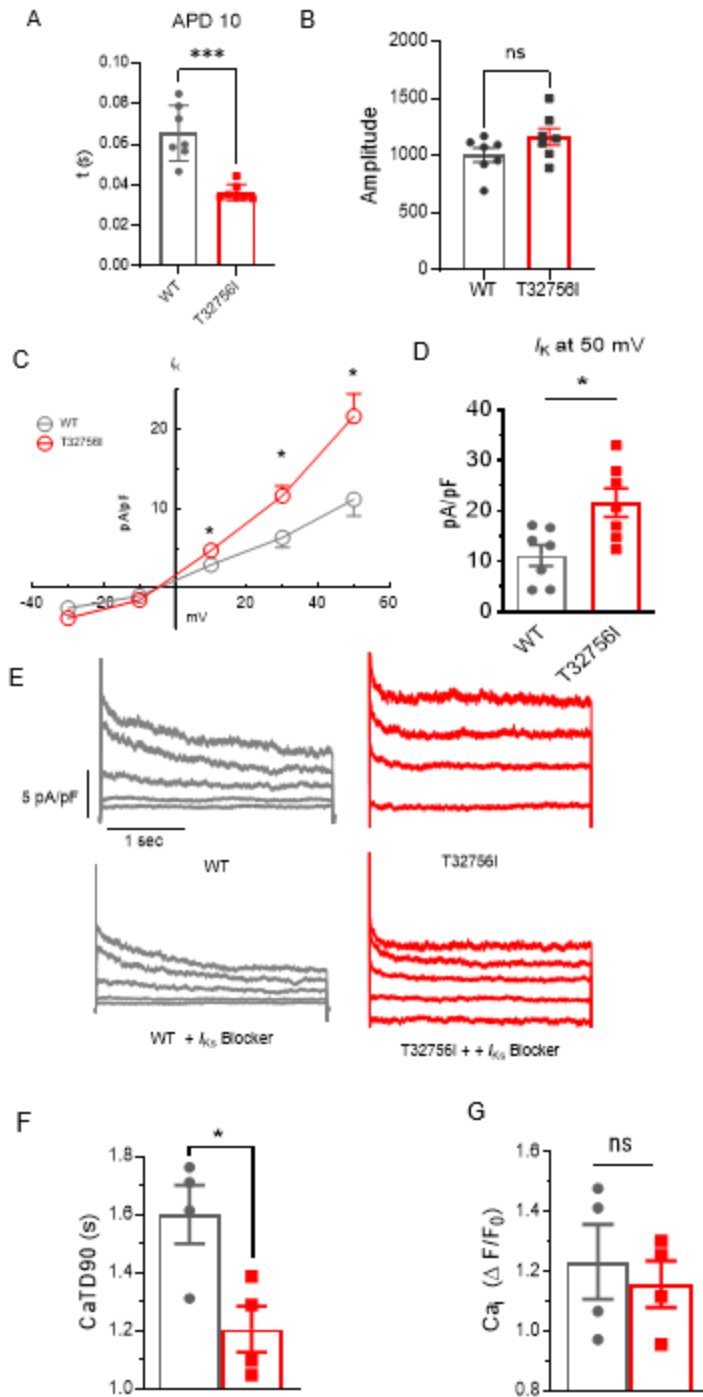

**Supplementary Figure 4: *TTN*-T32756I iPSC-aCMs display anomalous action potentials, potassium currents, and calcium-handling.** (A) Compared to the WT, *TTN*-T32756I shows reduction of action potential duration at the 10% (APD10) repolarization. (B) Bar graph showing no change in the amplitude of the AP. (C) Total potassium current

( $I_K$ ) and voltage relationship (I-V curves) in WT and *TTN-T32756I* iPSC-aCMs. (D) Total  $I_K$  current density at 50 mV. (E) Representative current traces at different voltages showing the isolation of the  $I_{Ks}$  current with the selective blocker HMR-1556 in both WT and *TTN-T32756I* iPSC-aCMs. (F-G) Bar graph showing that the *TTN-T32756I* iPSC-aCMs have decreased transient durations (F), but no change in the transient peak amplitudes (G) compared with the WT iPSC-aCMs. n.s.  $P>0.05$ ;  $*P<0.05$ ;  $***P<0.001$ .

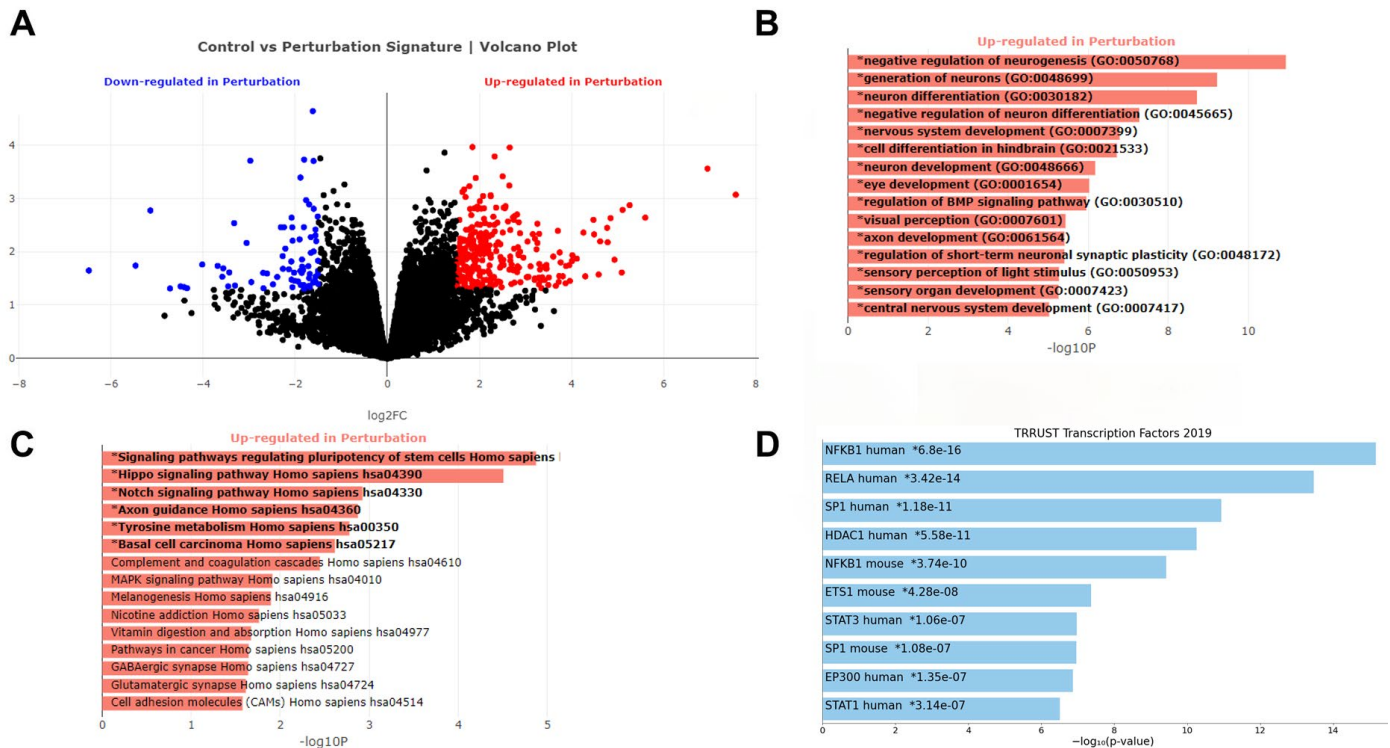

**Supplementary Figure 5: Upregulated pathways in *TTN-T32756I* iPSC-aCMs with the WT.** (A) Volcano plot showing spread of downregulated and upregulated differentially expressed genes (DEGs) (B) Top significantly enriched upregulated Gene-Ontology Biological process (GO-BP) pathways in the *TTN-T32756I* iPSC-aCMs. (C) Top significantly enriched upregulated Kyoto Encyclopedia of Genes and Genomes (KEGG) pathways in the *TTN-T32756I* iPSC-aCMs. (D) Top significantly enriched TTRUST transcription factors (TFs).

| N  | Age Range (yrs) | Sex | Race-Ethnicity | Nucleotide  | Amino Acid Change | dbSNP        | gnomAD Allele Frequency | Exon | Band        | Percent Spliced In (PSI) | REVEL Score |
|----|-----------------|-----|----------------|-------------|-------------------|--------------|-------------------------|------|-------------|--------------------------|-------------|
| 1  | 56-60           | F   | NHB            | c.70250T>C  | p.Ile23417Thr     | rs201836227  | 0.000221                | 326  | A-band      | 100                      | 0.66297     |
| 2  | 46-50           | M   | HL             | c.52022G>A  | p.Arg17341Gln     | rs370390570  | 0.000116                | 273  | A-band      | 100                      | 0.60691     |
| 3  | 46-50           | M   | HL             | c.62519G>A  | p.Gly20840Asp     | rs1326564200 | 0.000012                | 304  | A-band      | 100                      | 0.883       |
| 4  | 56-60           | M   | NHB            | c.59248G>A  | p.Gly19750Ser     | rs200732032  | 0.000109                | 300  | A-band      | 100                      | 0.75279     |
| 5  | 56-60           | M   | NHB            | c.58363G>A  | p.Gly19455Ser     | rs191927501  | 0.000157                | 297  | A-band      | 100                      | 0.80842     |
| 6  | 66-70           | M   | HL             | c.57727G>C  | p.Ala19243Pro     | rs1313667626 | 0.000004                | 295  | A-band      | 100                      | 0.81369     |
| 7  | 41-45           | F   | NHB            | c.101665G>A | p.Val33889Ile     | rs34924609   | 0.003099                | 358  | A-band      | 100                      | 0.17295     |
| 8  | 41-45           | F   | NHB            | c.6959G>A   | p.Arg2320His      | rs374615369  | 0.000076                | 30   | I-band      | 100                      | 0.82403     |
| 9  | 56-60           | M   | NHB            | c.42145G>T  | p.Val14049Leu     | rs1206523368 |                         |      | I-band      | 100                      | 0.73517     |
| 10 | 61-65           | M   | NHB            | c.67808C>T  | p.Ala22603Val     | rs199583938  | 0.000036                | 320  | A-band      | 100                      | 0.42028     |
| 11 | 61-65           | M   | NHB            | c.101557A>G | p.Lys33853Glu     | rs727505163  | 0.000004                | 358  | A-band      | 100                      | 0.75074     |
| 12 | 76-80           | F   | NHB            | c.93266G>A  | p.Arg31089His     | rs367993101  | 0.000028                | 339  | A-band      | 100                      | 0.87283     |
| 13 | 76-80           | F   | NHB            | c.970C>T    | p.Pro324Ser       | rs72647845   | 0.000598                | 7    | Z-disk      | 100                      | 0.70603     |
| 14 | 56-60           | M   | HL             | c.89426G>A  | p.Arg29809Gln     | rs72648238   | 0.000632                | 334  | A-band      | 100                      | 0.45592     |
| 15 | 56-60           | M   | HL             | c.99433C>T  | p.Arg33145Trp     | rs1338284042 | 0.000004                | 355  | A-band      | 100                      | 0.61955     |
| 16 | 76-80           | M   | NHB            | c.74870A>G  | p.Lys24957Arg     | rs760043791  | 0.000004                | 326  | A-band      | 100                      | 0.43483     |
| 17 | 76-80           | M   | NHB            | c.70817T>C  | p.Met23606Thr     | rs371030086  | 0.000040                | 326  | A-band      | 100                      | 0.624       |
| 18 | 81-85           | F   | NHB            | c.101665G>A | p.Val33889Ile     | rs34924609   | 0.003099                | 358  | A-band      | 100                      | 0.17295     |
| 19 | 36-40           | F   | NHB            | c.96605T>C  | p.Val32202Ala     | rs763365622  | 0.000004                | 347  | A-band      | 100                      | 0.54781     |
| 20 | 31-35           | F   | NHB            | c.70543T>G  | p.Tyr23515Asp     |              |                         |      | A-band      | 100                      | 0.67962     |
| 21 | 61-65           | M   | NHB            | c.4671G>A   | p.Met1557Ile      | rs139192633  | 0.000272                | 27   | near Z-disk | 100                      | 0.26882     |
| 22 | 66-70           | F   | NHB            | c.91937A>G  | p.Asn30646Ser     | rs72648245   | 0.000568                | 338  | A-band      | 100                      | 0.71558     |
| 23 | 66-70           | F   | NHB            | c.46693G>T  | p.Ala15565Ser     | rs145520397  | 0.000445                | 250  | I-band      | 100                      | 0.51417     |
| 24 | 66-70           | F   | NHB            | c.100396C>T | p.Arg33466Cys     | rs371908649  | 0.000145                | 357  | A-band      | 100                      | 0.8849      |
| 25 | 66-70           | F   | NHB            | c.56693G>A  | p.Arg18898His     | rs572453785  | 0.000051                | 291  | A-band      | 100                      | 0.29647     |
| 26 | 46-50           | M   | NHB            | c.82061T>G  | p.Val27354Gly     | rs368023868  | 0.000036                | 326  | A-band      | 100                      | 0.77847     |
| 27 | 46-50           | M   | NHB            | c.76987G>A  | p.Asp25663Asn     | rs143186270  | 0.000105                | 326  | A-band      | 100                      | 0.49396     |
| 28 | 81-85           | F   | NHB            | c.8938G>A   | p.Ala2980Thr      | rs72647885   | 0.000371                | 38   | I-band      | 100                      | 0.75822     |
| 29 | 66-70           | F   | NHB            | c.9077A>T   | p.Asn3026Ile      | rs11900987   | 0.000454                | 38   | I-band      | 100                      | 0.56024     |
| 30 | 81-85           | F   | HL             | c.7180G>C   | p.Glu2394Gln      | rs537269762  | 0.000004                | 31   | I-band      | 100                      | 0.58254     |
| 31 | 46-50           | M   | HL             | c.57586C>G  | p.Leu19196Val     | rs397517630  | 0.000171                | 295  | A-band      | 100                      | 0.50185     |
| 32 | 61-65           | F   | NHB            | c.44072C>T  | p.Thr14691Ile     | rs1048028645 |                         |      | I-band      | 100                      | 0.73445     |
| 33 | 61-65           | F   | NHB            | c.63245C>A  | p.Thr21082Asn     |              |                         |      | A-band      | 100                      | 0.74377     |
| 34 | 66-70           | F   | NHB            | c.101936C>G | p.Pro33979Arg     | rs200238877  | 0.000213                | 358  | A-band      | 100                      | 0.73517     |
| 35 | 66-70           | F   | NHB            | c.57683G>A  | p.Arg19228His     | rs114711705  | 0.000488                | 295  | A-band      | 100                      | 0.30369     |
| 36 | 66-70           | F   | NHB            | c.85691A>T  | p.Lys28564Ile     | rs199859344  | 0.000443                | 326  | A-band      | 100                      | 0.69443     |
| 37 | 56-60           | M   | NHB            | c.44525C>T  | p.Thr14842Ile     | rs370782364  | 0.000012                | 241  | I-band      | 100                      | 0.75347     |
| 38 | 56-60           | M   | NHB            | c.81502C>T  | p.Arg27168Cys     | rs377616334  | 0.000028                | 326  | A-band      | 100                      | 0.63269     |
| 39 | 66-70           | F   | NHB            | c.88340C>G  | p.Thr29447Arg     | rs140201636  | 0.000198                | 331  | A-band      | 100                      | 0.58883     |
| 40 | 66-70           | F   | NHB            | c.87137T>G  | p.Met29046Arg     | rs143975327  | 0.000192                | 328  | A-band      | 100                      | 0.81427     |
| 41 | 66-70           | F   | NHB            | c.73316C>T  | p.Thr24439Ile     | rs750110781  | 0.000008                | 326  | A-band      | 100                      | 0.32913     |
| 42 | 56-60           | F   | NHB            | c.98267C>T  | p.Thr32756Ile     | rs199805060  | 0.000330                | 352  | A-band      | 100                      | 0.58758     |
| 43 | 61-65           | M   | HL             | c.91573A>G  | p.Ile30525Val     | rs72648244   | 0.006222                | 337  | A-band      | 100                      | 0.18881     |
| 44 | 61-65           | M   | HL             | c.72931A>G  | p.Thr24311Ala     | rs56201325   | 0.003985                | 326  | A-band      | 100                      | 0.1533      |

| N  | Age Range (yrs) | Sex | Race-Ethnicity | Nucleotide  | Amino Acid Change | dbSNP        | gnomAD Allele Frequency | Exon | Band        | Percent Spliced In (PSI) | REVEL Score |
|----|-----------------|-----|----------------|-------------|-------------------|--------------|-------------------------|------|-------------|--------------------------|-------------|
| 45 | 61-65           | F   | NHB            | c.8938G>A   | p.Ala2980Thr      | rs72647885   | 0.000371                | 38   | I-band      | 100                      | 0.75822     |
| 46 | 66-70           | M   | NHB            | c.79612A>G  | p.Thr26538Ala     | rs150682764  | 0.000322                | 326  | A-band      | 100                      | 0.70029     |
| 47 | 66-70           | M   | HL             | c.14911T>G  | p.Cys4971Gly      | rs537312655  | 0.000439                | 50   | I-band      | 100                      | 0.3358      |
| 48 | 56-60           | M   | NHB            | c.43622C>T  | p.Ser14541Leu     | rs768180052  | 0.000008                | 236  | I-band      | 100                      | 0.60219     |
| 49 | 41-45           | F   | NHB            | c.69883G>A  | p.Ala23295Thr     | rs746519147  | 0.000032                | 326  | A-band      | 100                      | 0.21907     |
| 50 | 76-80           | M   | NHB            | c.52927C>T  | p.Arg17643Trp     | rs375944265  | 0.000060                | 276  | A-band      | 100                      | 0.75279     |
| 51 | 76-80           | M   | NHB            | c.103363C>T | p.Arg34455Cys     | rs72629785   | 0.000716                | 358  | A-band      | 100                      | 0.75687     |
| 52 | 76-80           | M   | NHB            | c.81539T>C  | p.Ile27180Thr     | rs182126530  | 0.000669                | 326  | A-band      | 100                      | 0.64318     |
| 53 | 76-80           | M   | NHB            | c.44077C>T  | p.Arg14693Cys     | rs200445568  | 0.000169                | 238  | I-band      | 100                      | 0.68844     |
| 54 | 61-65           | M   | NHB            | c.103363C>T | p.Arg34455Cys     | rs72629785   | 0.000716                | 358  | A-band      | 100                      | 0.75687     |
| 55 | 76-80           | M   | NHB            | c.61481T>C  | p.Ile20494Thr     | rs374845737  | 0.000022                | 304  | A-band      | 100                      | 0.7293      |
| 56 | 51-55           | F   | NHB            | c.54348A>T  | p.Glu18116Asp     | rs773746281  | 0.000016                | 281  | A-band      | 100                      | 0.48268     |
| 57 | 71-75           | M   | NHB            | c.103906C>T | p.Arg34636Cys     | rs768575577  | 0.000028                | 358  | A-band      | 100                      | 0.59861     |
| 58 | 71-75           | M   | NHB            | c.97892A>T  | p.Lys32631Ile     | rs944963846  | 0.000004                | 351  | A-band      | 100                      | 0.56959     |
| 59 | 51-55           | F   | NHB            | c.2765G>A   | p.Arg922His       | rs56046320   | 0.000703                | 16   | near Z-disk | 99                       | 0.27141     |
| 60 | 51-55           | F   | NHB            | c.60104G>A  | p.Cys20035Tyr     | rs774488793  |                         |      | A-band      | 100                      | 0.71869     |
| 61 | 51-55           | F   | NHB            | c.55079C>T  | p.Pro18360Leu     | rs192788942  | 0.000117                | 283  | A-band      | 100                      | 0.76881     |
| 62 | 91-95           | M   | HL             | c.95414T>G  | p.Phe31805Cys     |              |                         |      | A-band      | 100                      | 0.73005     |
| 63 | 91-95           | M   | HL             | c.74504A>G  | p.Tyr24835Cys     | rs201724962  | 0.000069                | 326  | A-band      | 100                      | 0.80901     |
| 64 | 56-60           | M   | NHB            | c.78896T>A  | p.Val26299Asp     | rs73036377   | 0.000131                | 326  | A-band      | 100                      | 0.84613     |
| 65 | 46-50           | M   | NHB            | c.101245G>A | p.Val33749Met     | rs201554140  | 0.000538                | 358  | A-band      | 100                      | 0.72631     |
| 66 | 46-50           | M   | NHB            | c.4199G>C   | p.Ser1400Thr      | rs138506461  | 0.000518                | 24   | near Z-disk | 100                      | 0.12618     |
| 67 | 46-50           | M   | NHB            | c.105127C>T | p.Arg35043Cys     | rs200378865  | 0.000462                | 358  | A-band      | 100                      | 0.79765     |
| 68 | 51-55           | M   | NHB            | c.2599A>G   | p.Ser867Gly       | rs148631577  | 0.000084                | 16   | near Z-disk | 99                       | 0.27398     |
| 69 | 51-55           | M   | NHB            | c.970C>T    | p.Pro324Ser       | rs72647845   | 0.000598                | 7    | Z-disk      | 100                      | 0.70603     |
| 70 | 56-60           | F   | NHB            | c.69130C>T  | p.Pro23044Ser     | rs55980498   | 0.003619                | 324  | A-band      | 100                      | 0.83802     |
| 71 | 51-55           | M   | HL             | c.95557C>A  | p.Arg31853Ser     |              |                         |      | A-band      | 100                      | 0.47777     |
| 72 | 51-55           | M   | HL             | c.67989A>T  | p.Leu22663Phe     | rs1485610846 | 0.000004                | 320  | A-band      | 100                      | 0.71401     |
| 73 | 46-50           | M   | HL             | c.88394C>T  | p.Ser29465Phe     | rs146181116  | 0.002928                | 331  | A-band      | 100                      | 0.65325     |
| 74 | 46-50           | M   | HL             | c.89314G>A  | p.Glu29772Lys     | rs200503016  | 0.000245                | 334  | A-band      | 100                      | 0.5787      |
| 75 | 61-65           | M   | NHB            | c.47737C>T  | p.Leu15913Phe     | rs138576504  | 0.000399                | 254  | A-band      | 100                      | 0.60456     |
| 76 | 61-65           | M   | NHB            | c.98893G>A  | p.Asp32965Asn     | rs186405108  | 0.000044                | 353  | A-band      | 100                      | 0.68757     |
| 77 | 71-75           | M   | HL             | c.93392T>G  | p.Val31131Gly     | rs1176407616 | 0.000012                | 339  | A-band      | 100                      | 0.47942     |
| 78 | 41-45           | F   | NHB            | c.97760G>A  | p.Arg32587His     | rs55704830   | 0.001734                | 350  | A-band      | 100                      | 0.50341     |
| 79 | 56-60           | F   | NHB            | c.95876T>A  | p.Val31959Glu     | rs761732372  | 0.000008                | 345  | A-band      | 100                      | 0.70924     |
| 80 | 91-95           | F   | HL             | c.83870G>C  | p.Arg27957Thr     | rs148067743  | 0.000145                | 326  | A-band      | 100                      | 0.23913     |
| 81 | 51-55           | F   | NHB            | c.61322A>G  | p.Asn20441Ser     | rs147580753  | 0.000260                | 304  | A-band      | 100                      | 0.34673     |
| 82 | 51-55           | F   | NHB            | c.8938G>A   | p.Ala2980Thr      | rs72647885   | 0.000371                | 38   | I-band      | 100                      | 0.75822     |
| 83 | 66-70           | F   | HL             | c.102030T>G | p.Ser34010Arg     | rs1296387134 | 0.000024                | 358  | A-band      | 100                      | 0.69273     |
| 84 | 61-65           | F   | HL             | c.102427A>T | p.Met34143Leu     | rs371226574  | 0.000004                | 358  | A-band      | 100                      | 0.46781     |
| 85 | 61-65           | F   | HL             | c.96928A>C  | p.Thr32310Pro     | rs542208825  | 0.000024                | 348  | A-band      | 100                      | 0.46444     |
| 86 | 61-65           | F   | HL             | c.56315C>T  | p.Thr18772Ile     | rs370118111  | 0.000008                | 289  | A-band      | 100                      | 0.57482     |
| 87 | 61-65           | M   | NHB            | c.9077A>T   | p.Asn3026Ile      | rs11900987   | 0.000454                | 38   | I-band      | 100                      | 0.56024     |
| 88 | 61-65           | M   | NHB            | c.82411G>A  | p.Gly27471Ser     | rs757130634  |                         |      | A-band      | 100                      | 0.31778     |
| 89 | 71-75           | M   | NHB            | c.98893G>C  | p.Asp32965His     | rs186405108  | 0.000213                | 353  | A-band      | 100                      | 0.70276     |



| N   | Age Range (yrs) | Sex | Race-Ethnicity | Nucleotide  | Amino Acid Change | dbSNP        | gnomAD Allele Frequency | Exon | Band        | Percent Spliced In (PSI) | REVEL Score |
|-----|-----------------|-----|----------------|-------------|-------------------|--------------|-------------------------|------|-------------|--------------------------|-------------|
| 90  | 71-75           | M   | NHB            | c.72137C>T  | p.Ala24046Val     | rs146767076  | 0.000363                | 326  | A-band      | 100                      | 0.20419     |
| 91  | 71-75           | M   | NHB            | c.72782G>A  | p.Arg24261Gln     | rs142874389  | 0.000574                | 326  | A-band      | 100                      | 0.65522     |
| 92  | 71-75           | M   | NHB            | c.55951G>A  | p.Glu18651Lys     |              |                         |      | A-band      | 100                      | 0.6251      |
| 93  | 71-75           | M   | NHB            | c.44965A>G  | p.Ile14989Val     | rs755040094  | 0.000004                | 244  | I-band      | 100                      | 0.50496     |
| 94  | 71-75           | M   | NHB            | c.88973T>C  | p.Ile29658Thr     | rs750026544  | 0.000024                | 333  | A-band      | 100                      | 0.16972     |
| 95  | 61-65           | M   | NHB            | c.106439A>G | p.His35480Arg     | rs766337455  |                         |      | M-band      | 100                      | 0.25558     |
| 96  | 56-60           | F   | NHB            | c.69383C>A  | p.Ser23128Tyr     | rs72646882   | 0.000576                | 324  | A-band      | 100                      | 0.76554     |
| 97  | 71-75           | F   | NHB            | c.47770T>A  | p.Leu15924Met     |              |                         |      | A-band      | 100                      | 0.83636     |
| 98  | 26-30           | M   | HL             | c.64997C>T  | p.Ala21666Val     | rs1396380194 | 0.000004                | 311  | A-band      | 100                      | 0.5065      |
| 99  | 26-30           | M   | HL             | c.106349C>G | p.Thr35450Ser     | rs371022420  | 0.000045                | 358  | A-band      | 100                      | 0.30369     |
| 100 | 26-30           | M   | HL             | c.97760G>C  | p.Arg32587Pro     | rs55704830   | 0.000393                | 350  | A-band      | 100                      | 0.58633     |
| 101 | 26-30           | M   | HL             | c.57165A>T  | p.Glu19055Asp     | rs1263660973 | 0.000004                | 293  | A-band      | 100                      | 0.58507     |
| 102 | 26-30           | M   | HL             | c.73168A>G  | p.Thr24390Ala     | rs182491843  | 0.000481                | 326  | A-band      | 100                      | 0.08068     |
| 103 | 26-30           | M   | HL             | c.76141G>A  | p.Ala25381Thr     | rs763636099  | 0.000008                | 326  | A-band      | 100                      | 0.84345     |
| 104 | 26-30           | M   | HL             | c.106827T>G | p.Ile35609Met     | rs727504540  | 0.000337                | 360  | M-band      | 100                      | 0.53062     |
| 105 | 51-55           | F   | HL             | c.88394C>T  | p.Ser29465Phe     | rs146181116  | 0.002928                | 331  | A-band      | 100                      | 0.65325     |
| 106 | 61-65           | F   | NHB            | c.79612A>G  | p.Thr26538Ala     | rs150682764  | 0.000322                | 326  | A-band      | 100                      | 0.70029     |
| 107 | 66-70           | M   | HL             | c.84309C>G  | p.His28103Gln     | rs749278779  | 0.000004                | 326  | A-band      | 100                      | 0.35528     |
| 108 | 61-65           | M   | NHB            | c.44077C>T  | p.Arg14693Cys     | rs200445568  | 0.000169                | 238  | I-band      | 100                      | 0.68844     |
| 109 | 61-65           | M   | NHB            | c.6927T>A   | p.Asn2309Lys      | rs147580120  | 0.000024                | 30   | I-band      | 100                      | 0.2335      |
| 110 | 61-65           | M   | NHB            | c.81539T>C  | p.Ile27180Thr     | rs182126530  | 0.000669                | 326  | A-band      | 100                      | 0.64318     |
| 111 | 66-70           | M   | NHB            | c.47737C>T  | p.Leu15913Phe     | rs138576504  | 0.000399                | 254  | A-band      | 100                      | 0.60456     |
| 112 | 66-70           | M   | NHB            | c.55547T>C  | p.Ile18516Thr     | rs146608896  | 0.000467                | 287  | A-band      | 100                      | 0.78662     |
| 113 | 61-65           | M   | NHB            | c.87611C>G  | p.Thr29204Arg     | rs72648228   | 0.000157                | 328  | A-band      | 100                      | 0.29647     |
| 114 | 61-65           | M   | NHB            | c.2764C>T   | p.Arg922Cys       | rs72647862   | 0.000331                | 16   | near Z-disk | 99                       | 0.54641     |
| 115 | 61-65           | M   | NHB            | c.86393G>A  | p.Arg28798Lys     | rs781458689  | 0.000008                | 326  | A-band      | 100                      | 0.62838     |
| 116 | 61-65           | M   | NHB            | c.62432A>G  | p.Asp20811Gly     | rs72646849   | 0.000165                | 304  | A-band      | 100                      | 0.76487     |
| 117 | 71-75           | F   | HL             | c.57145G>A  | p.Val19049Ile     | rs750251277  | 0.000080                | 293  | A-band      | 100                      | 0.56694     |
| 118 | 71-75           | F   | HL             | c.92444G>A  | p.Cys30815Tyr     | rs1185347998 | 0.000004                | 339  | A-band      | 100                      | 0.59375     |
| 119 | 81-85           | M   | HL             | c.8509A>G   | p.Ser2837Gly      | rs202024134  | 0.000004                | 36   | I-band      | 100                      | 0.43662     |
| 120 | 81-85           | M   | HL             | c.86759C>G  | p.Ser28920Cys     | rs1396089552 | 0.000004                | 326  | A-band      | 100                      | 0.36365     |
| 121 | 81-85           | M   | HL             | c.92176C>T  | p.Pro30726Ser     | rs72648247   | 0.002682                | 339  | A-band      | 100                      | 0.79583     |
| 122 | 76-80           | M   | NHB            | c.101245G>A | p.Val33749Met     | rs201554140  | 0.000538                | 358  | A-band      | 100                      | 0.72631     |
| 123 | 76-80           | M   | NHB            | c.4199G>C   | p.Ser1400Thr      | rs138506461  | 0.000518                | 24   | near Z-disk | 100                      | 0.12618     |
| 124 | 76-80           | M   | NHB            | c.105127C>T | p.Arg35043Cys     | rs200378865  | 0.000462                | 358  | A-band      | 100                      | 0.79765     |
| 125 | 46-50           | F   | NHB            | c.46040T>G  | p.Val15347Gly     | rs375367475  | 0.000044                | 248  | I-band      | 100                      | 0.77783     |
| 126 | 46-50           | F   | NHB            | c.72782G>A  | p.Arg24261Gln     | rs142874389  | 0.000574                | 326  | A-band      | 100                      | 0.65522     |
| 127 | 46-50           | F   | NHB            | c.72137C>T  | p.Ala24046Val     | rs146767076  | 0.000363                | 326  | A-band      | 100                      | 0.20419     |
| 128 | 66-70           | F   | NHB            | c.97106C>T  | p.Thr32369Ile     | rs559194338  | 0.000004                | 348  | A-band      | 100                      | 0.62729     |
| 129 | 76-80           | F   | NHB            | c.50390G>A  | p.Arg16797His     | rs200835354  | 0.000093                | 268  | A-band      | 100                      | 0.71084     |
| 130 | 66-70           | F   | HL             | c.94851T>A  | p.Asp31617Glu     | rs72648256   | 0.002881                | 342  | A-band      | 100                      | 0.6823      |
| 131 | 66-70           | F   | HL             | c.14870C>G  | p.Thr4957Ser      | rs72648925   | 0.002917                | 50   | I-band      | 100                      | 0.28911     |
| 132 | 66-70           | M   | NHB            | c.101936C>G | p.Pro33979Arg     | rs200238877  | 0.000213                | 358  | A-band      | 100                      | 0.73517     |
| 133 | 66-70           | M   | NHB            | c.85691A>T  | p.Lys28564Ile     | rs199859344  | 0.000443                | 326  | A-band      | 100                      | 0.69443     |
| 134 | 66-70           | M   | NHB            | c.57683G>A  | p.Arg19228His     | rs114711705  | 0.000488                | 295  | A-band      | 100                      | 0.30369     |

| N   | Age Range (yrs) | Sex | Race-Ethnicity | Nucleotide | Amino Acid Change | dbSNP       | gnomAD Allele Frequency | Exon | Band   | Percent Spliced In (PSI) | REVEL Score |
|-----|-----------------|-----|----------------|------------|-------------------|-------------|-------------------------|------|--------|--------------------------|-------------|
| 135 | 61-65           | F   | NHB            | c.61138C>A | p.Leu20380Met     | rs201167216 | 0.000271                | 304  | A-band | 100                      | 0.41658     |
| 136 | 61-65           | F   | NHB            | c.86911G>A | p.Gly28971Arg     | rs368921501 | 0.000040                | 327  | A-band | 100                      | 0.79217     |
| 137 | 61-65           | F   | NHB            | c.66692G>A | p.Arg22231His     | rs200971254 | 0.000343                | 316  | A-band | 100                      | 0.76881     |
| 138 | 61-65           | F   | HL             | c.69130C>T | p.Pro23044Ser     | rs55980498  | 0.003619                | 324  | A-band | 100                      | 0.83802     |

**Supplementary Table 1: List of *TTN* missense variants.** Age range represents patient's approximate age at AF diagnosis in years. M=male, F=female, HL = Hispanic/Latinx, NHB = non-Hispanic Black. Variants with a blank value in the dbSNP or gnomAD columns represent variants not present in those respective databases.

|                                                         | <b>Predicted<br/>Deleterious<br/><i>TTN</i> Missense<br/>Absent<br/>(N=88)</b> | <b>Predicted<br/>Deleterious<br/><i>TTN</i> Missense<br/>Present<br/>(N=43)</b> | <b>Total<br/>(N=131)</b> | <b>P-value</b> |
|---------------------------------------------------------|--------------------------------------------------------------------------------|---------------------------------------------------------------------------------|--------------------------|----------------|
| <b>Mean age at AF diagnosis (years)</b>                 | 63.7 (14.5)                                                                    | 63.0 (12.5)                                                                     | 63.5 (13.8)              | 0.803          |
| <b>Male sex</b>                                         | 47 (53.4%)                                                                     | 23 (53.5%)                                                                      | 70 (53.4%)               | 1.000          |
| <b>Race/ethnicity</b>                                   |                                                                                |                                                                                 |                          | 0.026          |
| Non-Hispanic Black                                      | 57 (64.8%)                                                                     | 36 (83.7%)                                                                      | 93 (71.0%)               |                |
| Hispanic/Latinx                                         | 31 (35.2%)                                                                     | 7 (16.3%)                                                                       | 38 (29.0%)               |                |
| <b>BMI (kg/m<sup>2</sup>)</b>                           | 33.8 (8.9)                                                                     | 34.9 (11.1)                                                                     | 34.1 (9.7)               | 0.540          |
| <b>Diabetes</b>                                         | 35 (39.8%)                                                                     | 15 (34.9%)                                                                      | 50 (38.2%)               | 0.702          |
| <b>Hypertension</b>                                     | 77 (87.5%)                                                                     | 36 (83.7%)                                                                      | 113 (86.3%)              | 0.594          |
| <b>Coronary artery disease</b>                          | 19 (21.6%)                                                                     | 13 (30.2%)                                                                      | 32 (24.4%)               | 0.288          |
| <b>History of stroke/transient ischemic attack</b>      | 17 (19.3%)                                                                     | 9 (20.9%)                                                                       | 26 (19.8%)               | 0.819          |
| <b>Congestive heart failure</b>                         | 32 (36.4%)                                                                     | 22 (51.2%)                                                                      | 54 (41.2%)               | 0.131          |
| <b>Nonischemic dilated cardiomyopathy</b>               | 6 (7.1%)                                                                       | 6 (15.4%)                                                                       | 12 (9.7%)                | 0.191          |
| <b>Estimated glomerular filtration rate<br/>(mg/dL)</b> | 69.1 (24.6)                                                                    | 68.9 (24.8)                                                                     | 69.1 (24.6)              | 0.965          |
| <b>Ventricular rate</b>                                 | 90.9 (27.4)                                                                    | 103.7 (31.4)                                                                    | 95.3 (29.4)              | 0.022          |
| <b>QRS interval (ms)</b>                                | 97.3 (24.3)                                                                    | 102.7 (30.0)                                                                    | 99.2 (26.3)              | 0.292          |
| <b>QTc interval (ms)</b>                                | 453.9 (38.7)                                                                   | 470.6 (44.0)                                                                    | 459.6 (41.2)             | 0.035          |
| <b>Left ventricular ejection fraction (%)</b>           |                                                                                |                                                                                 |                          | 0.144          |
| Normal (>=50%)                                          | 55 (62.5%)                                                                     | 22 (51.2%)                                                                      | 77 (58.8%)               |                |
| Mildly decreased (40-49%)                               | 11 (12.5%)                                                                     | 3 (7.0%)                                                                        | 14 (10.7%)               |                |
| Moderately decreased (30-39%)                           | 7 (8.0%)                                                                       | 6 (14.0%)                                                                       | 13 (9.9%)                |                |
| Severely decreased (20-29%)                             | 8 (9.1%)                                                                       | 8 (18.6%)                                                                       | 16 (12.2%)               |                |
| Very severely decreased (< 20%)                         | 7 (8.0%)                                                                       | 4 (9.3%)                                                                        | 11 (8.4%)                |                |
| <b>Left ventricular end diastolic diameter<br/>(mm)</b> | 45.6 (9.2)                                                                     | 49.8 (8.0)                                                                      | 46.9 (9.0)               | 0.021          |
| <b>Left ventricular dilatation</b>                      | 9 (11.8%)                                                                      | 8 (22.2%)                                                                       | 17 (15.2%)               | 0.168          |
| <b>Left atrial size</b>                                 |                                                                                |                                                                                 |                          | 0.728          |
| Normal                                                  | 26 (31.3%)                                                                     | 12 (28.6%)                                                                      | 38 (30.4%)               |                |
| Mildly dilated                                          | 22 (26.5%)                                                                     | 16 (38.1%)                                                                      | 38 (30.4%)               |                |
| Moderately dilated                                      | 22 (26.5%)                                                                     | 8 (19.0%)                                                                       | 30 (24.0%)               |                |
| Severely dilated                                        | 13 (15.7%)                                                                     | 6 (14.3%)                                                                       | 19 (15.2%)               |                |
| <b>Left atrial diameter (mm)</b>                        | 39.8 (7.5)                                                                     | 41.5 (8.4)                                                                      | 40.4 (7.8)               | 0.293          |

**Supplementary Table 2: Clinical characteristics of ethnic minority subjects with AF stratified by presence of predicted deleterious rare missense *TTN* variants.** \*Data are missing for the following variables: eGFR (1), electrocardiogram within 3 months of AF diagnosis (11), LVEDD (19), left atrial size (6), left atrial diameter (21). Left ventricular dilatation is defined as left ventricular end diastolic diameter greater than 2 standard deviations above the normal sex-specific mean value. Variants with a REVEL score  $\geq 0.7$

were defined as predicted deleterious. Continuous data are represented as mean (standard deviation) and categorical data are represented as count (%).

| N  | Age Range (yrs) | Sex | Race-Ethnicity | Nucleotide  | Amino Acid Change | Exon | Band        | Percent Spliced In (PSI) | REVEL Score | LVEDD (mm) | LVEF (%)                        |
|----|-----------------|-----|----------------|-------------|-------------------|------|-------------|--------------------------|-------------|------------|---------------------------------|
| 1  | 56-60           | F   | NHB            | c.70250T>C  | p.Ile234177Thr    | 326  | A-band      | 100                      | 0.66297     | 57.9       | Mildly decreased (40-49%)       |
| 2  | 41-45           | F   | NHB            | c.101665G>A | p.Val33889Ile     | 358  | A-band      | 100                      | 0.17295     | 53.2       | Mildly decreased (40-49%)       |
| 3  | 41-45           | F   | NHB            | c.6959G>A   | p.Arg2320His      | 30   | I-band      | 100                      | 0.82403     | 53.2       | Mildly decreased (40-49%)       |
| 4  | 66-70           | F   | NHB            | c.91937A>G  | p.Asn30646Ser     | 338  | A-band      | 100                      | 0.71558     | 56.9       | Severely decreased (20-29%)     |
| 5  | 66-70           | F   | NHB            | c.46693G>T  | p.Ala15565Ser     | 250  | I-band      | 100                      | 0.51417     | 56.9       | Severely decreased (20-29%)     |
| 6  | 56-60           | M   | NHB            | c.44525C>T  | p.Thr14842Ile     | 241  | I-band      | 100                      | 0.75347     | 59.0       | Very severely decreased (< 20%) |
| 7  | 56-60           | M   | NHB            | c.81502C>T  | p.Arg27168Cys     | 326  | A-band      | 100                      | 0.63269     | 59.0       | Very severely decreased (< 20%) |
| 8  | 41-45           | F   | NHB            | c.69883G>A  | p.Ala23295Thr     | 326  | A-band      | 100                      | 0.21907     | 60.3       | Moderately decreased (30-39%)   |
| 9  | 46-50           | M   | NHB            | c.101245G>A | p.Val33749Met     | 358  | A-band      | 100                      | 0.72631     | 66.5       | Very severely decreased (< 20%) |
| 10 | 46-50           | M   | NHB            | c.4199G>C   | p.Ser1400Thr      | 24   | near Z-disk | 100                      | 0.12618     | 66.5       | Very severely decreased (< 20%) |
| 11 | 46-50           | M   | NHB            | c.105127C>T | p.Arg35043Cys     | 358  | A-band      | 100                      | 0.79765     | 66.5       | Very severely decreased (< 20%) |
| 12 | 26-30           | M   | HL             | c.64997C>T  | p.Ala21666Val     | 311  | A-band      | 100                      | 0.5065      | 60.3       | Severely decreased (20-29%)     |
| 13 | 26-30           | M   | HL             | c.106349C>G | p.Thr35450Ser     | 358  | A-band      | 100                      | 0.30369     | 60.3       | Severely decreased (20-29%)     |
| 14 | 26-30           | M   | HL             | c.97760G>C  | p.Arg32587Pro     | 350  | A-band      | 100                      | 0.58633     | 60.3       | Severely decreased (20-29%)     |
| 15 | 26-30           | M   | HL             | c.57165A>T  | p.Glu19055Asp     | 293  | A-band      | 100                      | 0.58507     | 60.3       | Severely decreased (20-29%)     |
| 16 | 26-30           | M   | HL             | c.73168A>G  | p.Thr24390Ala     | 326  | A-band      | 100                      | 0.08068     | 60.3       | Severely decreased (20-29%)     |
| 17 | 26-30           | M   | HL             | c.76141G>A  | p.Ala25381Thr     | 326  | A-band      | 100                      | 0.84345     | 60.3       | Severely decreased (20-29%)     |
| 18 | 26-30           | M   | HL             | c.106827T>G | p.Ile35609Met     | 360  | M-band      | 100                      | 0.53062     | 60.3       | Severely decreased (20-29%)     |
| 19 | 66-70           | M   | NHB            | c.47737C>T  | p.Leu15913Phe     | 254  | A-band      | 100                      | 0.60456     | 66.2       | Moderately decreased (30-39%)   |
| 20 | 66-70           | M   | NHB            | c.55547T>C  | p.Ile18516Thr     | 287  | A-band      | 100                      | 0.78662     | 66.2       | Moderately decreased (30-39%)   |

**Supplementary Table 3: *TTN* missense variants in subjects meeting criteria for nonischemic dilated cardiomyopathy.** Nonischemic dilated cardiomyopathy was defined by left ventricular ejection fraction <50% and left ventricular end diastolic diameter (LVEDD) greater than 2 standard deviations above the sex-specific mean, as well as coronary angiogram confirming the absence of obstructive coronary artery disease.

| Characteristic                  | Unadjusted      |                     |         | Partially Adjusted |                     |         | Fully Adjusted  |                     |         |
|---------------------------------|-----------------|---------------------|---------|--------------------|---------------------|---------|-----------------|---------------------|---------|
|                                 | HR <sup>†</sup> | 95% CI <sup>†</sup> | p-value | HR <sup>†</sup>    | 95% CI <sup>†</sup> | p-value | HR <sup>†</sup> | 95% CI <sup>†</sup> | p-value |
| <i>TTN</i> Missense Present     | 1.81            | 1.04, 3.15          | 0.036   | 1.82               | 1.04, 3.17          | 0.035   | 1.80            | 1.03, 3.15          | 0.039   |
| Age (years)                     |                 |                     |         | 0.99               | 0.97, 1.01          | 0.366   | 0.99            | 0.97, 1.01          | 0.430   |
| Male sex (vs. female)           |                 |                     |         | 0.74               | 0.43, 1.27          | 0.268   | 0.69            | 0.38, 1.24          | 0.218   |
| Race-ethnicity                  |                 |                     |         |                    |                     |         |                 |                     |         |
| Non-Hispanic Black              |                 |                     |         |                    |                     |         | —               | —                   |         |
| Hispanic/Latinx                 |                 |                     |         |                    |                     |         | 1.14            | 0.60, 2.19          | 0.683   |
| Baseline ejection fraction <50% |                 |                     |         |                    |                     |         | 1.38            | 0.78, 2.44          | 0.272   |

<sup>†</sup>HR = Hazard Ratio, CI = Confidence Interval

**Supplementary Table 4: Parameter estimates for univariable and multivariable Cox proportional hazard models of atrial fibrillation and heart failure-related hospitalizations.** A partially adjusted multivariable model contained covariates of age and sex, and the fully adjusted model additionally accounted for race-ethnicity and ejection fraction <50% closest to AF diagnosis.

| Characteristic                  | Unadjusted      |                     |         | Partially Adjusted |                     |         | Fully Adjusted  |                     |         |
|---------------------------------|-----------------|---------------------|---------|--------------------|---------------------|---------|-----------------|---------------------|---------|
|                                 | HR <sup>†</sup> | 95% CI <sup>†</sup> | p-value | HR <sup>†</sup>    | 95% CI <sup>†</sup> | p-value | HR <sup>†</sup> | 95% CI <sup>†</sup> | p-value |
| TTN Missense                    |                 |                     |         |                    |                     |         |                 |                     |         |
| None                            | —               | —                   |         | —                  | —                   |         | —               | —                   |         |
| REVEL <0.70                     | 1.60            | 0.78, 3.28          | 0.198   | 1.61               | 0.79, 3.26          | 0.188   | 1.60            | 0.80, 3.21          | 0.182   |
| REVEL ≥0.70                     | 1.92            | 1.04, 3.53          | 0.036   | 1.92               | 1.04, 3.56          | 0.038   | 1.91            | 1.04, 3.51          | 0.038   |
| Age (years)                     |                 |                     |         | 0.99               | 0.97, 1.01          | 0.363   | 0.99            | 0.97, 1.01          | 0.412   |
| Male sex (vs. female)           |                 |                     |         | 0.73               | 0.42, 1.25          | 0.251   | 0.68            | 0.38, 1.23          | 0.204   |
| Race-ethnicity                  |                 |                     |         |                    |                     |         |                 |                     |         |
| Non-Hispanic Black              |                 |                     |         |                    |                     |         | —               | —                   |         |
| Hispanic/Latinx                 |                 |                     |         |                    |                     |         | 1.17            | 0.63, 2.16          | 0.619   |
| Baseline ejection fraction <50% |                 |                     |         |                    |                     |         | 1.35            | 0.77, 2.36          | 0.302   |

<sup>†</sup>HR = Hazard Ratio, CI = Confidence Interval

**Supplementary Table 5: Cox proportional hazard models of hospitalizations related to TTN missense variant based on *in silico* prediction of impact.** REVEL score of ≥0.70 indicates potentially deleterious effect. A partially adjusted multivariable model contained covariates of age and sex, and the fully adjusted model additionally accounted for race-ethnicity and ejection fraction <50% closest to AF diagnosis.

| Characteristic                  | Unadjusted      |                     |         | Partially Adjusted |                     |         | Fully Adjusted  |                     |         |
|---------------------------------|-----------------|---------------------|---------|--------------------|---------------------|---------|-----------------|---------------------|---------|
|                                 | HR <sup>†</sup> | 95% CI <sup>†</sup> | p-value | HR <sup>†</sup>    | 95% CI <sup>†</sup> | p-value | HR <sup>†</sup> | 95% CI <sup>†</sup> | p-value |
| <i>TTN</i> Missense Present     | 1.81            | 1.00, 3.29          | 0.051   | 1.84               | 1.01, 3.34          | 0.046   | 1.83            | 1.01, 3.32          | 0.046   |
| Age (years)                     |                 |                     |         | 0.99               | 0.97, 1.01          | 0.365   | 0.99            | 0.97, 1.01          | 0.360   |
| Male sex (vs. female)           |                 |                     |         | 0.75               | 0.42, 1.35          | 0.344   | 0.70            | 0.37, 1.32          | 0.268   |
| Race-ethnicity                  |                 |                     |         |                    |                     |         |                 |                     |         |
| Non-Hispanic Black              |                 |                     |         |                    |                     |         | —               | —                   |         |
| Hispanic/Latinx                 |                 |                     |         |                    |                     |         | 1.17            | 0.59, 2.31          | 0.649   |
| Baseline ejection fraction <50% |                 |                     |         |                    |                     |         | 1.41            | 0.76, 2.61          | 0.280   |

<sup>†</sup>HR = Hazard Ratio, CI = Confidence Interval

**Supplementary Table 6: Cox proportional hazard models of hospitalizations excluding cases with nonischemic dilated cardiomyopathy.** A total of 12 subjects were excluded. A partially adjusted multivariable model contained covariates of age and sex, and the fully adjusted model additionally accounted for race-ethnicity and ejection fraction <50% closest to AF diagnosis.



|                           |                                                                                                                             |
|---------------------------|-----------------------------------------------------------------------------------------------------------------------------|
| Nucleotide and Protein ID | NM_001267550.2(TTN):c.98267C>T ( NP_001254479.2:p.Thr32756Ile)                                                              |
| Allele ID                 | 173049                                                                                                                      |
| Variant type              | single nucleotide variant (missense)                                                                                        |
| Variant length            | 1 bp                                                                                                                        |
| Cytogenetic location      | 2q31.2                                                                                                                      |
| Genomic location          | 2: 178539798 (GRCh38) GRCh38 UCSC; 2: 179404525 (GRCh37) GRCh37 UCSC                                                        |
| Canonical SPDI            | NC_000002.12:178539797:G:A                                                                                                  |
| Source                    | <a href="https://www.ncbi.nlm.nih.gov/clinvar/variation/178164/">https://www.ncbi.nlm.nih.gov/clinvar/variation/178164/</a> |

**Supplementary Table 7: *TTN*-T32756I variant information.**
